# Supplementary material for: Effects of High Intensity Interval Training on Pregnant Rats, and the Placenta, Heart and Liver of Their Fetuses
Source: PLoS One. 2015 Nov 13;10(11):e0143095. doi: 10.1371/journal.pone.0143095 (PMC4643918; doi:10.1371/journal.pone.0143095)
Supplement: S11 File — (XLSX) [file pone.0143095.s011.xlsx]

## Sheet: TAC
Standards	Reading 1	Reading 1	Mean	SD	mM Trolox	A405
1	0.864	0.81	0.837	0.027	0	1.3
2	0.793	0.76	0.7765	0.0165	0.015	0.84
3	0.759	0.749	0.754	0.005	0.045	0.78
4	0.654	0.632	0.643	0.011	0.105	0.64
5	0.516	0.513	0.5145	0.0015	0.21	0.51
6	0.155	0.144	0.1495	0.0055	0.42	0.15
Placenta	a	b	mean	SD	Blank	c	d	mean	SD
P-1	1.28	1.338	1.309	0.029		1.953	1.981	1.967	0.014
P-2	1.37	1.408	1.389	0.019		2.045	1.972	2.0085	0.0365
P-3	1.397	1.332	1.3645	0.0325		1.931	1.886	1.9085	0.0225
P-4	0.997	1.341	1.169	0.172		1.869	1.782	1.8255	0.0435
P-5	1.259	1.295	1.277	0.018		1.693	1.653	1.673	0.02	1.3017
P-6	1.108	1.131	1.1195	0.0115		1.556	1.736	1.646	0.09
P-7	1.141	1.043	1.092	0.049		1.785	1.801	1.793	0.008
P-8	1.021	1.136	1.0785	0.0575		1.852	1.629	1.7405	0.1115
P-9	1.014	1.051	1.0325	0.0185		1.702	1.794	1.748	0.046
P-10	1.102	1.319	1.2105	0.1085		1.87	1.905	1.8875	0.0175
P-11	1.026	1.261	1.1435	0.1175		1.881	1.935	1.908	0.027	1.11864
P-12	1.129	1.179	1.154	0.025		1.875	1.824	1.8495	0.0255	0.000640752
Heart	a	b	mean	SD		c	d	mean	SD
H-1	1.176	1.457	1.3165	0.1405		1.841	1.925	1.883	0.042
H-2	1.121	1.752	1.4365	0.3155		1.822	1.923	1.8725	0.0505
H-3	1.236	1.139	1.1875	0.0485		1.833	1.9	1.8665	0.0335
H-4	1.308	1.376	1.342	0.034		2.086	1.98	2.033	0.053
H-5	1.296	1.521	1.4085	0.1125		1.774	1.85	1.812	0.038	1.3382
H-6	1.607	1.476	1.5415	0.0655		1.984	1.938	1.961	0.023
H-7	1.125	0.952	1.0385	0.0865		2.024	1.999	2.0115	0.0125
H-8	0.922	1.151	1.0365	0.1145		2.115	2.019	2.067	0.048
H-9	1.17	1.059	1.1145	0.0555		1.984	2.042	2.013	0.029
H-10	1.014	1.068	1.041	0.027		1.606	1.586	1.596	0.01
H-11	1.349	1.42	1.3845	0.0355		2.007	1.997	2.002	0.005	1.21107
H-12	1.294	1.348	1.321	0.027		1.928	1.722	1.825	0.103	0.114699
Lever	a	b	mean	SD		c	d	mean	SD
L-1	0.397	0.364	0.3805	0.0165		0.944	0.962	0.953	0.009
L-2	0.312	0.339	0.3255	0.0135		0.98	0.924	0.952	0.028
L-3	0.365	0.308	0.3365	0.0285		0.919	0.928	0.9235	0.0045
L-4	0.27	0.285	0.2775	0.0075		0.742	0.784	0.763	0.021
L-5	0.294	0.281	0.2875	0.0065		0.791	0.935	0.863	0.072	0.3215
L-6	0.231	0.226	0.2285	0.0025		0.89	0.918	0.904	0.014
L-7	0.365	0.368	0.3665	0.0015		0.853	0.795	0.824	0.029
L-8	0.314	0.334	0.324	0.01		0.705	0.704	0.7045	0.0005
L-9	0.346	0.464	0.405	0.059		0.768	0.783	0.7755	0.0075
L-10	0.875	0.289	0.582	0.293		0.804	0.752	0.778	0.026
L-11	0.29	0.321	0.3055	0.0155		0.835	0.895	0.865	0.03	0.358214
L-12	0.326	0.266	0.296	0.03		0.882	0.848	0.865	0.017	0.254468	0.057266

## Sheet: MDA
Standard	1	2	Mean	SD
1	1.581	1.716	1.6485	0.0675
2	0.88	0.868	0.874	0.006			MDA Assay
3	0.45	0.457	0.4535	0.0035											MDA Plate 1
4	0.266	0.256	0.261	0.005												1	2	3	4	5	6	7	8	9	10	11	12
5	0.156	0.153	0.1545	0.0015					Standard Curve						A	0.187	0.263	0.482	0.449	0.47	0.401	0.174	0.42	0.145	0.181	0.163	0.205
6	0.101	0.092	0.0965	0.0045					OD 532	Conc					B	0.167	0.19	0.241	0.225	0.169	0.201	0.209	0.255	0.257	0.231	0.259	0.248
7	0.093	0.073	0.083	0.01					125	1.65					C	0.374	0.416	0.46	0.398	0.541	0.567	0.368	0.338	0.454	0.408	0.405	0.399
8	0.063	0.057	0.06	0.003					62.5	0.87					D	0.345	0.389	0.334	0.36	0.081	0.077	0.325	0.292	0.367	0.383	0.085	0.082
9	0.048	0.049	0.0485	0.0005					31.25	0.45					E	0.144	0.153	0.325	0.369	0.132	0.148	0.148	0.134	0.128	0.146	0.108	0.111
									15.63	0.26					F	0.134	0.145	0.124	0.136	0.144	0.158	0.376	0.414	0.168	0.281	0.14	0.177
Placenta	1	2	Mean	SD					7.81	0.15					G	1.817	1.718	0.889	1.058	0.512	0.512	0.29	0.277	0.163	0.176	0.047	0.047
P-1	0.203	0.263	0.233	0.03					3.91	0.1					H	0.049	0.049	0.102	0.102	0.083	0.083	0.063	0.06	0.05	0.052	0.047	0.047
P-2	0.474	0.385	0.4295	0.0445					1.95	0.08
P-3	0.433	0.345	0.389	0.044					0.98	0.06
P-4	0.154	0.19	0.172	0.018					0	0.05
P-5	0.131	0.162	0.1465	0.0155
P-6	0.149	0.179	0.164	0.015
P-7	0.146	0.166	0.156	0.01
P-8	0.204	0.195	0.1995	0.0045
P-9	0.149	0.167	0.158	0.009
P-10	0.183	0.204	0.1935	0.0105
P-11	0.23	0.197	0.2135	0.0165	t-Test (1/2)
P-12	0.237	0.214	0.2255	0.0115	0.0538234
Heart	1	2	Mean	SD
H-1	0.315	0.34	0.3275	0.0125
H-2	0.396	0.362	0.379	0.017
H-3	0.456	0.452	0.454	0.002
H-4	0.31	0.298	0.304	0.006
H-5	0.379	0.342	0.3605	0.0185
H-6	0.346	0.333	0.3395	0.0065
H-7	0.278	0.342	0.31	0.032
H-8	0.259	0.293	0.276	0.017
H-9	0.083	0.075	0.079	0.004
H-10	0.274	0.245	0.2595	0.0145
H-11	0.322	0.326	0.324	0.002	t-Test (1/2)	(2/2)
H-12	0.089	0.091	0.09	0.001	0.0214657	0.0429315
Lever	1	2	Mean	SD
L-1	0.128	0.132	0.13	0.002
L-2	0.284	0.326	0.305	0.021
L-3	0.13	0.132	0.131	0.001
L-4	0.126	0.112	0.119	0.007
L-5	0.113	0.126	0.1195	0.0065
L-6	0.101	0.094	0.0975	0.0035
L-7	0.126	0.131	0.1285	0.0025
L-8	0.111	0.107	0.109	0.002
L-9	0.126	0.126	0.126	0
L-10	0.281	0.33	0.3055	0.0245
L-11	0.142	0.232	0.187	0.045	t-Test
L-12	0.132	0.142	0.137	0.005	0.455111

## Sheet: SOD
Second reading
Placenta	1	2	3	Mean	SD	Blank 2	Blank 2	Mean	SD	sample-BL2	0,362-K	L/0,362
P-1	0.136	0.133	0.136	0.135	0.00141421	0.109	0.108	0.1085	0.0005	0.0265	0.3355	0.926796
P-2	0.169	0.166	0.169	0.168	0.00141421	0.133	0.12	0.1265	0.0065	0.0415	0.3205	0.885359
P-3	0.132	0.142	0.159	0.144333	0.0111455	0.127	0.142	0.1345	0.0075	0.00983333	0.352167	0.972836
P-4	0.178	0.18	0.179	0.179	0.000816497	0.142	0.13	0.136	0.006	0.043	0.319	0.881215	0.918785	Mean		Second reading
P-5	0.171	0.157	0.187	0.171667	0.0122565	0.139	0.152	0.1455	0.0065	0.0261667	0.335833	0.927716	0.0334491	SD
P-6	0.184	0.177	0.191	0.184	0.00571548	0.153	0.135	0.144	0.009	0.04	0.322	0.889503				Blank 1
P-7	0.166	0.164	0.163	0.164333	0.00124722	0.117	0.114	0.1155	0.0015	0.0488333	0.313167	0.865101				0.389	0.414	0.433	0.438
P-8	0.172	0.17	0.178	0.173333	0.00339935	0.134	0.134	0.134	0	0.0393333	0.322667	0.891344
P-9	0.172	0.195	0.167	0.178	0.0121929	0.162	0.155	0.1585	0.0035	0.0195	0.3425	0.946133				Mean	0.4185
P-10	0.168	0.214	0.217	0.199667	0.0224252	0.182	0.176	0.179	0.003	0.0206667	0.341333	0.94291	0.9118	Mean		SD	0.0192419
P-11	0.187	0.206	0.181	0.191333	0.0106562	0.163	0.16	0.1615	0.0015	0.0298333	0.332167	0.917587	0.0283053	SD
P-12	0.21	0.236	0.227	0.224333	0.0107806	0.202	0.196	0.199	0.003	0.0253333	0.336667	0.930018	0.364469	P-value
																Blank 3
Heart	1	2	3	Mean	SD	Blank 2	Blank 2	Mean	SD	sample-BL2	0,362-K	L/0,362				0.057	0.057	0.058	0.057	0.057	0.055
H-1	0.127	0.149	0.145	0.140333	0.00956847	0.107	0.088	0.0975	0.0095	0.0428333	0.319167	0.881676
H-2	0.134	0.14	0.125	0.133	0.00616441	0.097	0.096	0.0965	0.0005	0.0365	0.3255	0.899171				Mean	0.0568333
H-3	0.162	0.161	0.162	0.161667	0.000471405	0.127	0.139	0.133	0.006	0.0286667	0.333333	0.92081				SD	0.000897527
H-4	0.13	0.132	0.163	0.141667	0.015107	0.104	0.106	0.105	0.001	0.0366667	0.325333	0.898711	0.90221	Mean
H-5	0.126	0.136	0.117	0.126333	0.0077603	0.094	0.094	0.094	0	0.0323333	0.329667	0.910681	0.0131215	SD
H-6	0.152	0.129	0.139	0.14	0.0094163	0.11	0.109	0.1095	0.0005	0.0305	0.3315	0.915746
H-7	0.154	0.168	0.168	0.163333	0.00659966	0.112	0.092	0.102	0.01	0.0613333	0.300667	0.830571
H-8	0.158	0.159	0.17	0.162333	0.0054365	0.106	0.113	0.1095	0.0035	0.0528333	0.309167	0.854052
H-9	0.158	0.151	0.142	0.150333	0.00654896	0.103	0.118	0.1105	0.0075	0.0398333	0.322167	0.889963
H-10	0.119	0.126	0.117	0.120667	0.00385861	0.085	0.086	0.0855	0.0005	0.0351667	0.326833	0.902855	0.885491	Mean
H-11	0.144	0.145	0.124	0.137667	0.00967241	0.091	0.095	0.093	0.002	0.0446667	0.317333	0.876611	0.0320311	SD
H-12	0.145	0.14	0.145	0.143333	0.00235702	0.115	0.12	0.1175	0.0025	0.0258333	0.336167	0.928637	0.168878	P-value
Liver	1	2	3	Mean	SD	Blank 2	Blank 2	Mean	SD	sample-BL2	0,362-K	L/0,362
L-1	0.214	0.215	0.205	0.211333	0.00449691	0.183	0.168	0.1755	0.0075	0.0358333	0.326167	0.901013
L-2	0.203	0.198	0.197	0.199333	0.00262467	0.177	0.172	0.1745	0.0025	0.0248333	0.337167	0.9314
L-3	0.207	0.21	0.215	0.210667	0.00329983	0.2	0.21	0.205	0.005	0.00566667	0.356333	0.984346
L-4	0.221	0.218	0.207	0.215333	0.00601849	0.215	0.174	0.1945	0.0205	0.0208333	0.341167	0.942449	0.935175	Mean
L-5	0.198	0.197	0.177	0.190667	0.00967241	0.157	0.164	0.1605	0.0035	0.0301667	0.331833	0.916667	0.0282651	SD
L-6	0.166	0.171	0.174	0.170333	0.00329983	0.152	0.151	0.1515	0.0005	0.0188333	0.343167	0.947974
L-7	0.194	0.193	0.164	0.183667	0.0139124	0.171	0.185	0.178	0.007	0.00566667	0.356333	0.984346
L-8	0.184	0.189	0.187	0.186667	0.0020548	0.158	0.273	0.2155	0.0575	-0.0288333	0.390833	1.07965
L-9	0.192	0.184	0.189	0.188333	0.00329983	0.208	0.151	0.1795	0.0285	0.00883333	0.353167	0.975599
L-10	0.177	0.179	0.213	0.189667	0.0165193	0.404	0.142	0.273	0.131	-0.0833333	0.445333	1.2302	1.02092	Mean
L-11	0.18	0.191	0.195	0.188667	0.0063421	0.172	0.267	0.2195	0.0475	-0.0308333	0.392833	1.08517	0.114381	SD
L-12	0.192	0.201	0.182	0.191667	0.0077603	0.139	0.131	0.135	0.004	0.0566667	0.305333	0.843462	0.0825335	P-value
Final reading
Placenta	1	2	3	Mean	SD	Blank 2	Blank 2	Mean	SD	sample-BL2	0,333-K	L/0,333
P-1	0.406	0.392	0.43	0.409333	0.0156915	0.3	0.383	0.3415	0.0415	0.0678333	0.265167	0.796296
P-2	0.611	0.607	0.63	0.616	0.0100333	0.366	0.351	0.3585	0.0075	0.2575	0.0755	0.226727
P-3	0.255	0.424	0.511	0.396667	0.106284	0.312	0.318	0.315	0.003	0.0816667	0.251333	0.754755
P-4	0.608	0.617	0.589	0.604667	0.0116714	0.372	0.366	0.369	0.003	0.235667	0.0973333	0.292292	0.517017	Mean
P-5	0.474	0.478	0.629	0.527	0.0721434	0.338	0.393	0.3655	0.0275	0.1615	0.1715	0.515015	0.232073	SD		Final reading
P-6	0.637	0.623	0.662	0.640667	0.0161314	0.461	0.348	0.4045	0.0565	0.236167	0.0968333	0.290791
P-7	0.534	0.502	0.588	0.541333	0.0354902	0.269	0.33	0.2995	0.0305	0.241833	0.0911667	0.273774				Blank 1
P-8	0.601	0.611	0.632	0.614667	0.0129185	0.386	0.393	0.3895	0.0035	0.225167	0.107833	0.323824				0.402	0.397	0.424	0.378
P-9	0.413	0.638	0.492	0.514333	0.0932035	0.397	0.436	0.4165	0.0195	0.0978333	0.235167	0.706206
P-10	0.491	0.647	0.665	0.601	0.0781281	0.421	0.437	0.429	0.008	0.172	0.161	0.483483	0.435221	Mean		Mean	0.40025
P-11	0.543	0.647	0.548	0.579333	0.0478911	0.369	0.404	0.3865	0.0175	0.192833	0.140167	0.420921	0.145366	SD		SD	0.0163764
P-12	0.6	0.685	0.661	0.648667	0.0357802	0.497	0.499	0.498	0.001	0.150667	0.182333	0.547548	0.254784	P-value
																Blank 3
Heart	1	2	3	Mean	SD	Blank 2	Blank 2	Mean	SD	sample-BL2	0,333-K	L/0,333				0.057	0.057	0.073	0.073	0.073
H-1	0.375	0.582	0.58	0.512333	0.0971128	0.32	0.226	0.273	0.047	0.239333	0.0936667	0.281281
H-2	0.496	0.56	0.531	0.529	0.0261661	0.296	0.325	0.3105	0.0145	0.2185	0.1145	0.343844				Mean	0.0666
H-3	0.419	0.504	0.512	0.478333	0.0420819	0.258	0.316	0.287	0.029	0.191333	0.141667	0.425425				SD	0.00783837
H-4	0.462	0.465	0.506	0.477667	0.0200721	0.29	0.305	0.2975	0.0075	0.180167	0.152833	0.458959	0.388689	Mean
H-5	0.541	0.555	0.488	0.528	0.028856	0.334	0.345	0.3395	0.0055	0.1885	0.1445	0.433934	0.0661544	SD			Blank 1 - Blank 3 = 0,333
H-6	0.508	0.455	0.499	0.487333	0.0231565	0.303	0.326	0.3145	0.0115	0.172833	0.160167	0.480981
H-7	0.503	0.561	0.566	0.543333	0.0285929	0.312	0.32	0.316	0.004	0.227333	0.105667	0.317317
H-8	0.564	0.545	0.538	0.549	0.0109848	0.334	0.375	0.3545	0.0205	0.1945	0.1385	0.415916
H-9	0.527	0.593	0.577	0.565667	0.0281109	0.329	0.397	0.363	0.034	0.202667	0.130333	0.391391
H-10	0.547	0.558	0.55	0.551667	0.0046428	0.354	0.357	0.3555	0.0015	0.196167	0.136833	0.410911	0.403904	Mean
H-11	0.487	0.558	0.562	0.535667	0.0344513	0.31	0.34	0.325	0.015	0.210667	0.122333	0.367367	0.0488238	SD
H-12	0.603	0.591	0.598	0.597333	0.00492161	0.372	0.452	0.412	0.04	0.185333	0.147667	0.443443	0.342244	P-value
Liver	1	2	3	Mean	SD	Blank 2	Blank 2	Mean	SD	sample-BL2	0,333-K	L/0,333
L-1	0.657	0.703	0.703	0.687667	0.0216846	0.487	0.524	0.5055	0.0185	0.182167	0.150833	0.452953
L-2	0.663	0.648	0.655	0.655333	0.00612826	0.482	0.45	0.466	0.016	0.189333	0.143667	0.431431
L-3	0.576	0.659	0.655	0.63	0.0382187	0.449	0.495	0.472	0.023	0.158	0.175	0.525526
L-4	0.661	0.709	0.662	0.677333	0.0223954	0.525	0.482	0.5035	0.0215	0.173833	0.159167	0.477978	0.498198	Mean
L-5	0.541	0.63	0.502	0.557667	0.0535682	0.403	0.448	0.4255	0.0225	0.132167	0.200833	0.603103	0.0610993	SD
L-6	0.603	0.618	0.605	0.608667	0.00664998	0.389	0.405	0.397	0.008	0.211667	0.121333	0.364364
L-7	0.533	0.59	0.367	0.496667	0.094595	0.37	0.372	0.371	0.001	0.125667	0.207333	0.622623
L-8	0.627	0.611	0.613	0.617	0.00711805	0.436	0.507	0.4715	0.0355	0.1455	0.1875	0.563063
L-9	0.512	0.525	0.524	0.520333	0.00590668	0.47	0.367	0.4185	0.0515	0.101833	0.231167	0.694194
L-10	0.508	0.519	0.526	0.517667	0.0074087	0.598	0.344	0.471	0.127	0.0466667	0.286333	0.85986	0.632418	Mean
L-11	0.539	0.594	0.606	0.579667	0.02917	0.405	0.532	0.4685	0.0635	0.111167	0.221833	0.666166	0.138374	SD
L-12	0.472	0.507	0.519	0.499333	0.0199388	0.396	0.374	0.385	0.011	0.114333	0.218667	0.656657	0.0466382	P-value

## Sheet: POX
1
2
3
4
5
6
Placenta	1	2	3	4	Mean	SD
P-1	0.208	0.199	0.209	0.213	0.20725	0.00511737
P-2	0.193	0.186	0.211	0.2	0.1975	0.00923309
P-3	0.23	0.227	0.233	0.232	0.2305	0.00229129	0.20475	Mean
P-4	0.174	0.176	0.173	0.186	0.17725	0.00516599	0.0174377	SD
P-5	0.212	0.215	0.203	0.215	0.21125	0.00491808
P-6	0.164	0.137	0.14	0.143	0.146	0.0106066
P-7	0.127	0.131	0.148	0.14	0.1365	0.00813941
P-8	0.2	0.191	0.188	0.188	0.19175	0.00491808
P-9	0.199	0.204	0.205	0.22	0.207	0.00784219
P-10	0.192	0.176	0.178	0.177	0.18075	0.00653357	0.177036	Mean
P-11	0.183	0.182	0.187	0.189	0.18525	0.00286138	0.0239819	SD
P-12	0.18	0.189	0.19	0.209	0.192	0.0105594	0.0361015
Heart	1	2	3	4	Mean	SD
H-1	0.101	0.097	0.109	0.109	0.104	0.00519615
H-2	0.109	0.112	0.116	0.112	0.11225	0.00248747
H-3	0.147	0.154	0.171	0.175	0.16175	0.0116055	0.1196
H-4	0.122	0.121	0.133	0.133	0.12725	0.00576086	0.0238891
H-5	0.089	0.091	0.095	0.096	0.09275	0.00286138
H-6	0.071	0.103	0.111	0.112	0.09925	0.016679
H-7	0.109	0.111	0.129	0.124	0.11825	0.00846685
H-8	0.134	0.125	0.147	0.134	0.135	0.00784219
H-9	0.083	0.079	0.094	0.092	0.087	0.00620484
H-10	0.069	0.068	0.065	0.067	0.06725	0.00147902	0.0997857	Mean
H-11	0.109	0.105	0.102	0.11	0.1065	0.00320156	0.0209069	SD
H-12	0.083	0.086	0.085	0.087	0.08525	0.00147902	0.0971112
Lever	1	2	3	4	Mean	SD
L-1	0.233	0.248	0.262	0.254	0.24925	0.0106154
L-2	0.273	0.281	0.304	0.295	0.28825	0.0120286
L-3	0.265	0.272	0.301	0.29	0.282	0.0142653	0.27455
L-4	0.275	0.228	0.238	0.329	0.2675	0.0395885	0.0145494
L-5	0.249	0.296	0.242	0.356	0.28575	0.0455652
L-6	0.222	0.306	0.259	0.304	0.27275	0.0348093
L-7	0.306	0.308	0.346	0.163	0.28075	0.0698261
L-8	0.278	0.245	0.237	0.308	0.267	0.0282223
L-9	0.249	0.331	0.234	0.273	0.27175	0.0369281
L-10	0.102	0.114	0.125	0.068	0.10225	0.0213819	0.200143	Mean
L-11	0.121	0.088	0.103	0.048	0.09	0.0269165	0.0845808	SD
L-12	0.116	0.107	0.119	0.124	0.1165	0.00618466	0.0529681
POX Plate 1 Initial
	1	2	3	4	5	6	7	8	9	10	11	12
A	0.205	0.196	0.205	0.209	0.192	0.184	0.207	0.197	0.227	0.224	0.228	0.228	570
B	0.169	0.17	0.168	0.18	0.205	0.209	0.197	0.21	0.159	0.135	0.138	0.14	570
C	0.128	0.125	0.143	0.135	0.192	0.184	0.182	0.182	0.192	0.197	0.198	0.204	570
D	0.185	0.169	0.174	0.172	0.177	0.177	0.181	0.183	0.177	0.187	0.188	0.206	570
E	0.057	0.051	0.046	0.046	0.046	0.047	0.047	0.047	0.047	0.046	0.048	0.047	570
F	0.045	0.046	0.046	0.048	0.046	0.046	0.046	0.047	0.047	0.046	0.046	0.046	570
G	0.045	0.046	0.046	0.046	0.048	0.047	0.047	0.053	0.045	0.047	0.048	0.048	570
H	0.047	0.048	0.048	0.046	0.046	0.046	0.047	0.046	0.047	0.049	0.046	0.046	570
POX Plate 2 Initial
	1	2	3	4	5	6	7	8	9	10	11	12
A	0.098	0.095	0.105	0.104	0.101	0.104	0.109	0.104	0.142	0.141	0.169	0.16	570
B	0.121	0.128	0.133	0.137	0.088	0.088	0.091	0.085	0.074	0.103	0.102	0.108	570
C	0.102	0.101	0.13	0.116	0.128	0.118	0.146	0.125	0.079	0.075	0.094	0.091	570
D	0.068	0.067	0.063	0.064	0.111	0.099	0.098	0.105	0.079	0.082	0.082	0.082	570
E	0.046	0.046	0.046	0.046	0.041	0.046	0.047	0.048	0.048	0.047	0.047	0.047	570
F	0.046	0.052	0.046	0.047	0.046	0.046	0.046	0.047	0.046	0.046	0.05	0.047	570
G	0.045	0.046	0.046	0.049	0.048	0.05	0.047	0.046	0.045	0.047	0.048	0.048	570
H	0.047	0.048	0.047	0.047	0.048	0.049	0.047	0.048	0.048	0.049	0.046	0.046	570
POX Plate 3 initial
	1	2	3	4	5	6	7	8	9	10	11	12
A	0.098	0.095	0.105	0.104	0.101	0.104	0.109	0.104	0.142	0.141	0.169	0.16	570
B	0.121	0.128	0.133	0.137	0.088	0.088	0.091	0.085	0.074	0.103	0.102	0.108	570
C	0.102	0.101	0.13	0.116	0.128	0.118	0.146	0.125	0.079	0.075	0.094	0.091	570
D	0.068	0.067	0.063	0.064	0.111	0.099	0.098	0.105	0.079	0.082	0.082	0.082	570
E	0.046	0.046	0.046	0.046	0.041	0.046	0.047	0.048	0.048	0.047	0.047	0.047	570
F	0.046	0.052	0.046	0.047	0.046	0.046	0.046	0.047	0.046	0.046	0.05	0.047	570
G	0.045	0.046	0.046	0.049	0.048	0.05	0.047	0.046	0.045	0.047	0.048	0.048	570
H	0.047	0.048	0.047	0.047	0.048	0.049	0.047	0.048	0.048	0.049	0.046	0.046	570
